# Supplementary material for: CD148 Tyrosine Phosphatase Promotes Cadherin Cell Adhesion
Source: PubMed Central journal article supplement (PMC4227875; doi:10.1371/journal.pone.0112753), 2014-11-11

Takahashi K et al. Supplemental Figure S1

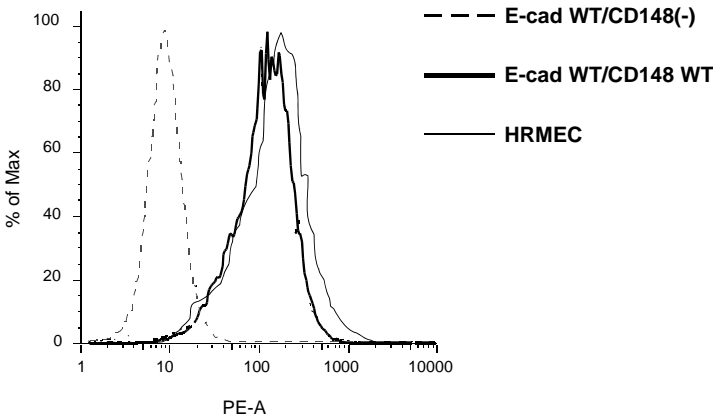

Supplement: pone.0112753.s001.pdf [file pone.0112753.s001.pdf]
